# Supplementary material for: Correction to: Preventing Respiratory Syncytial Virus in Children in France: A Narrative Review of the Importance of a Reinforced Partnership Between Parents, Healthcare Professionals, and Public Health Authorities
Source: Springer Nature journal article supplement (doi:10.1007/s40121-023-00807-z), 2023-05-13
Supplement: MOESM1 [file 40121_2023_807_MOESM1_ESM.pdf]

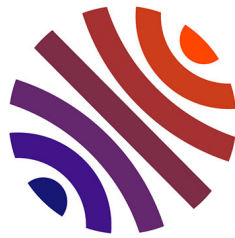

**HAL**  
open science

# Prévention du Virus Respiratoire Syncytial chez les Enfants en France : Une Revue Narrative de l'importance de nouer un fort partenariat entre Parents, Professionnels de Santé et Autorités de Santé Publique

Didier Pinquier, Pascal Crepey, Pierre Tissières, Astrid Vabret, Jean-christophe Rozé, François Dubos, Fabienne Cahn-Sellem, Etienne Javouhey, Robert Cohen, Catherine Weil-Olivier

## ► To cite this version:

Didier Pinquier, Pascal Crepey, Pierre Tissières, Astrid Vabret, Jean-christophe Rozé, et al.. Prévention du Virus Respiratoire Syncytial chez les Enfants en France : Une Revue Narrative de l'importance de nouer un fort partenariat entre Parents, Professionnels de Santé et Autorités de Santé Publique. *Infectious Diseases and Therapy*, 2023, 12 (2), pp.317-332. 10.1007/s40121-022-00737-2. hal-03922997v1

**HAL Id: hal-03922997**

**<https://hal.inrae.fr/hal-03922997v1>**

Submitted on 1 Feb 2024 (v1), last revised 4 Jan 2023 (v2)

**HAL** is a multi-disciplinary open access archive for the deposit and dissemination of scientific research documents, whether they are published or not. The documents may come from teaching and research institutions in France or abroad, or from public or private research centers.

L'archive ouverte pluridisciplinaire **HAL**, est destinée au dépôt et à la diffusion de documents scientifiques de niveau recherche, publiés ou non, émanant des établissements d'enseignement et de recherche français ou étrangers, des laboratoires publics ou privés.

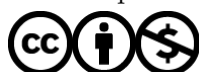

Distributed under a Creative Commons Attribution - NonCommercial 4.0 International License

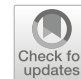

# Prévention du Virus Respiratoire Syncytial chez les Enfants en France : Une Revue Narrative de l'importance de nouer un fort partenariat entre Parents, Professionnels de Santé et Autorités de Santé Publique

Didier Pinquier · Pascal Crépey · Pierre Tissières · Astrid Vabret · Jean-Christophe Roze · François Dubos · Fabienne Cahn-Sellem · Etienne Javouhey · Robert Cohen · Catherine Weil-Olivier

Soumis le 17 octobre 2022/Accepté le 21 novembre 2022  
© The Author(s) 2022

## RÉSUMÉ

Très contagieux, le virus respiratoire syncytial (VRS) est responsable d'épidémie saisonnière avec environ 50 000 hospitalisations chaque année chez les enfants de moins de 5 ans en France, principalement chez les enfants de moins d'un an, nés à terme. Il est nécessaire d'élaborer une stratégie de prévention universelle pour proté-

ger les jeunes enfants contre l'infection, ce qui permettrait de réduire la pression exercée par le VRS chaque année sur les enfants infectés par ce virus, leurs parents et les ressources du système de soins français. Plusieurs stratégies potentielles font actuellement l'objet d'études cliniques. Elles comprennent l'immunisation passive par la vaccination maternelle ou l'administration au moment de la naissance ou peu

D. Pinquier  
Service de médecine intensive néonatale et pédiatrique,  
Université de Normandie, UNIROUEN, INSERM U1245,  
CHU Rouen, 7600 Rouen, France

P. Crépey  
Université de Rennes, EHESP, CNRS, Inserm,  
Arènes-UMR 6051, RSMS-U 1309, Rennes, France

P. Tissières  
Soins intensifs pédiatriques et médecine néonatale,  
AP-HP Université Paris Saclay, Hôpital Bicêtre, Le  
Kremlin-Bicêtre, Paris, France

P. Tissières  
Institut de Biologie Intégrative de la Cellule, Université  
de Saclay Paris, CNRS, DEA, Gif Sur Yvette, France

P. Tissières  
FUH SEPSIS, APHP, Inserm, Université Paris Saclay,  
Le Kremlin-Bicêtre, France

A. Vabret  
Service de Virologie, Université de Normandie,  
UNICAEN, UNIROUEN, DYNAMICURE U1311,  
CHU de Caen, Caen, France

J.-C. Roze  
Hôpital Mère Enfant, CHU de Nantes, 36 Boulevard  
Jean Monnet, 44093 Nantes, France

F. Dubos  
Université de Lille, CHU Lille, Urgences Pédiatriques  
et Maladies Infectieuses, ULR2694 METRICS, Lille,  
France

F. Cahn-Sellem  
Cabinet Privé, 24 Rue Volta, 92800 Puteaux, France

F. Cahn-Sellem - R. Cohen  
AFP (Association Française de Pédiatrie Ambulatoire),  
155 Rue Edouard Branly, Zone de la Fouquetière,  
44150 Ancenis, France

E. Javouhey  
Unité de soins intensifs pédiatriques, Hospices Civils  
de Lyon, Hôpital Femme Mère Enfant, Lyon, France

E. Javouhey  
Université Claude Bernard Lyon 1-Hospices Civils de  
Lyon-bioMérieux, UMR HCL-bioMérieux, 69003 Lyon,  
France

après d'anticorps monoclonaux à longue durée d'action aux nourrissons et la vaccination proposée plus tard dans la petite enfance. L'arrivée de ces nouvelles stratégies nécessitera une coordination et une démarche pro-active synergique entre les parents, les soins de santé primaires, les autorités de santé publique, afin de faciliter leur utilisation et de garantir que tous les enfants reçoivent une protection adaptée dès le début de leur première saison de VRS.

**Mots-clés :** Enfants ; France ; Immunisation ; Nourrissons ; Nirsévimab ; Palivizumab ; Pharmacoeconomie ; Soins de santé primaires ; Santé publique ; Virus respiratoire syncytial

### Les points clés du résumé

Le virus respiratoire syncytial (VRS) est la cause la plus fréquente d'infection aiguë des voies respiratoires inférieures et d'hospitalisation pour maladie respiratoire chez les enfants de moins de 5 ans dans le monde.

L'infection saisonnière par le VRS et ses conséquences (telles que la bronchiolite) représente une charge considérable sur les systèmes de santé, y compris en France, soulignant l'importance des stratégies visant à réduire la transmission du VRS, avec en premier lieu la mise en place d'un suivi épidémiologique efficace de la circulation virale pour anticiper et planifier l'organisation des ressources sanitaires.

Il a été démontré que les interventions non pharmaceutiques réduisent la transmission virale ainsi que les hospitalisations et admissions en soins intensifs qui y sont associées.

Les approches pharmaceutiques pour prévenir l'infection par le VRS comprennent l'immunisation passive par vaccination maternelle ou administration d'anticorps monoclonaux à longue durée d'action dès la naissance ou peu après et l'immunisation active par la vaccination des nourrissons.

La mise en place de programmes nationaux de surveillance du VRS, combinée à l'éducation des parents sur l'importance de réduire la transmission du VRS et à un programme de prévention primaire systématique du VRS (intégrant des stratégies d'immunisation), contribuera à réduire l'impact de l'infection par le VRS sur le système de santé français.

## INTRODUCTION

Le virus respiratoire syncytial (VRS) est un virus à ARN monocaténaire à polarité négative, très contagieux, qui infecte la plupart des enfants au moins une fois avant l'âge de 2 ans [1, 2]. Le VRS est la principale cause d'infection aiguë des voies respiratoires inférieures (IVRI) et d'hospitalisation pour maladie respiratoire chez les enfants de moins de 5 ans dans le monde [3, 4]. Les infections suivent généralement un schéma saisonnier, dont le moment varie selon l'année et la situation géographique [5]. Dans les pays tempérés de l'hémisphère Nord, comme la France, cette augmentation des infections à VRS coïncide généralement avec des températures plus froides entre octobre/novembre et mars/avril, avec un pic épidémique en novembre/décembre pour la France [5, 6]. Chaque année cette circulation du VRS exerce sur les hôpitaux une pression supplémentaire qui se surajoute à l'activité d'autres épidémies sur la même période liées à d'autres virus respiratoires, tels que la grippe par exemple [7].

L'infection par le VRS ne confère pas d'immunité durable et, par conséquent, des réinfections surviennent fréquemment, bien qu'elles soient généralement moins graves que l'infection initiale [2, 8]. Les infections primaires et récurrentes, par le VRS, commencent généra-

R. Cohen

Service de Néonatalogie, Centre Hospitalier Intercommunal de Créteil, GRC Gemini, Université de Paris XII, Association Clinique et Thérapeutique Infantile du Val de Marne, Paris, France

C. Weil-Olivier (✉)

Université de Paris 7, Denis Diderot, 28 Rue Parmentier, 92200 Neuilly Sur Seine, France  
e-mail : cweilolivier@gmail.com

lement par une atteinte des voies respiratoires supérieures qui tend à être plus sévère et plus prolongée qu'une rhinorrhée simple [2]. La plupart des enfants présente une maladie qui guérit spontanément et qui répond à des soins à domicile [2, 9]. Cependant, chez les très jeunes nourrissons, l'infection VRS au cours de la première année de vie peut évoluer vers une IVRI grave, notamment au cours des trois premiers mois de vie [10]. Bien que ce risque de maladie sévère et d'hospitalisation soit plus élevé chez les enfants présentant des facteurs de risque connus (prématurité ou comorbidités) [11], jusqu'à 90 % des enfants hospitalisés pour une IVRI liée au VRS sont nés à terme et sans problème médical sous-jacent [10, 12, 13].

La bronchiolite est une maladie du nourrisson marquée par une inflammation des voies aériennes pulmonaires inférieures qui se manifeste typiquement chez les enfants au cours de leurs deux premières années de vie et communément associée à une infection à VRS [9, 14-16]. La symptomatologie de la bronchiolite virale aiguë peut varier avec des signes respiratoires modérés, tels qu'une toux, une polypnée ou et un travail respiratoire accru [2, 9, 16], jusqu'à l'insuffisance respiratoire grave, nécessitant une assistance respiratoire et rendant nécessaire ou prolongeant les séjours des enfants dans des unités de soins critiques pour les patients les plus graves, comme les unités de soins intensifs pédiatriques (USIP) [16, 17]. Dans la plupart des cas, le traitement de l'IVRI par le VRS se limite à une prise en charge symptomatique avec soins de soutien, incluant une hydratation, un apport supplémentaire d'oxygène et dans les cas graves de détresse respiratoire : une assistance ventilatoire (oxygénothérapie, ventilation non invasive : lunettes nasales haut débit, pression positive continue voire ventilation assistée) pour les plus graves [17-19]. En l'absence de traitement médicamenteux spécifique efficace pour le traitement d'une maladie sévère due au VRS, l'application des stratégies de prévention primaire devraient jouer un rôle essentiel pour réduire l'impact du VRS chez les jeunes enfants [20, 21].

En 2020/2021, une augmentation de l'incidence des IVRI lors d'une saison tardive de VRS a été observée en France après la levée des mesures strictes non pharmacologiques de lutte contre la

COVID-19 alors que couvre-feu, distanciation sociale et mesures barrières d'ordre respiratoire (masques) chez les adultes étaient maintenus (Fig. 1). Lorsque les mesures publiques liées à la prévention COVID-19 ont encore été assouplies, la saison épidémique de VRS suivante pour l'année 2021/2022 a commencé plus tôt que d'habitude, mais a été d'une ampleur comparable à celle des saisons antérieures. Pour la saison 2022/2023, en revanche, si l'épidémie a également commencé plus tôt son intensité a été plus forte avec un nombre particulièrement élevé d'infections et d'hospitalisations [22, 23]. Cela suggère que les adultes asymptomatiques ou peu symptomatiques jouent un rôle majeur dans la transmission du VRS [24-26].

L'impact sur l'épidémie à VRS des mesures barrières non pharmacologiques mises en place pendant la pandémie COVID-19, la recrudescence après l'assouplissement de ces mesures [26-32], soulignent à la fois leur importance dans la prévention de l'infection par le VRS et de la maladie chez les enfants, mais aussi le fait que ces mesures seules ont été insuffisantes pour supprimer une certaine circulation et transmission faibles, à bas bruit, du VRS. Il est donc nécessaire d'évaluer les mesures de prévention universelle ciblant la transmission du VRS dans la population générale [26].

Dans cette revue, nous explorons l'importance de renforcer un partenariat pro-actif entre les parents, les professionnels de santé et les autorités de santé publique pour mettre en œuvre des stratégies appropriées de prévention du VRS en France, en commençant par un aperçu de l'épidémiologie du VRS pédiatrique et des coûts associés.

### Stratégie de recherche et critères de sélection

Nous avons recherché dans PubMed les articles récemment publiés (à partir de janvier 2018) et potentiellement pertinents pour cette revue de littérature, en utilisant les termes de recherche généraux « virus respiratoire syncytial », « bronchiolite », « Europe » et « France ». Les articles portant sur l'épidémiologie, l'utilisation des ressources de santé, les coûts et la gestion de la santé publique du VRS en France et dans d'autres pays européens ont été sélectionnés en vue de leur inclusion.

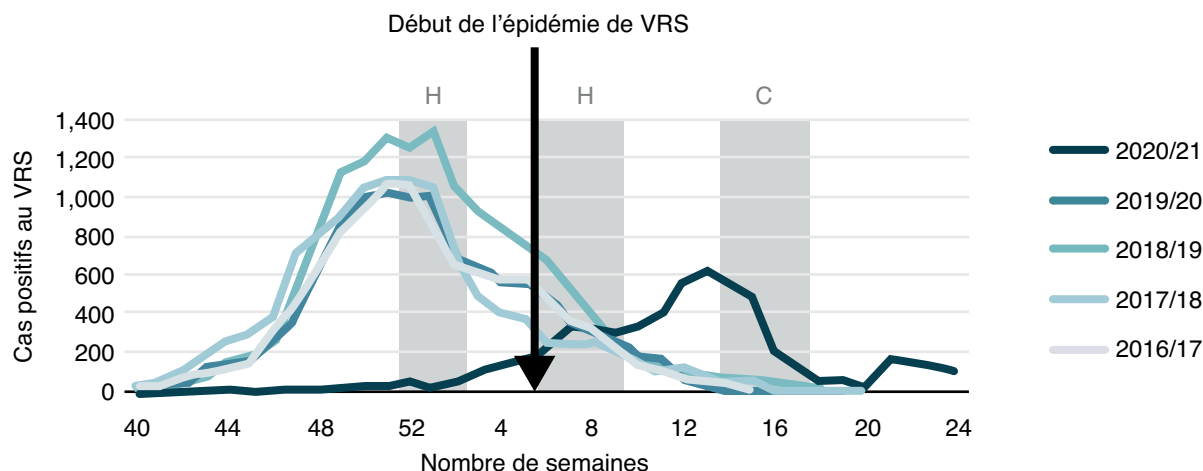

**Fig. 1** Nombre hebdomadaire de cas signalés de virus respiratoire syncytial (VRS) en France au cours des saisons épidémiologiques 2016/17 à 2020/21\*. Figure tirée de van Summeren et al. 2020 [29], sous licence CC BY-4.0/portion montrée avec une étiquette en forme de flèche modifiée pour

indiquer la date de la saison. \*Source de données : Réseau européen de surveillance de la grippe. C, restrictions liées au COVID-19 remises en œuvre en 2021 ; H, vacances scolaires d'hiver.

### Respect des directives en matière d'éthique

Cet article est basé sur des études menées précédemment et ne contient aucune nouvelle étude réalisée par l'un des auteurs avec des participants humains ou des animaux.

## ÉPIDÉMIOLOGIE ET IMPACT DES INTERVENTIONS NON PHARMACEUTIQUES

Bien que la plupart des décès associés au VRS surviennent dans des pays à ressources limitées, le VRS est de façon substantielle associé à une morbidité et à une utilisation considérable des ressources de santé dans le monde entier, y compris dans les pays européens à revenus élevés [3, 4, 13, 14, 33, 34]. Une analyse rétrospective (financée par Sanofi Pasteur et AstraZeneca) des données sur les hospitalisations associées au VRS en France couvrant une période de 8 ans, de 2010 à 2018, a montré que le nombre de ces hospitalisations chez les enfants âgés de moins de 5 ans variait de 43 715 à 54 616 par saison (tableau 1) [13]. Parmi ces hospitalisations, 3 % au total (N = 12 496 séjours) ont nécessité une admission en USIP. L'impact le plus important a été observé chez les

enfants de moins d'un an, chez qui le VRS était la cause principale d'hospitalisation, responsable de jusqu'à 28 % des hospitalisations toutes causes confondues versus 6 % chez les enfants plus âgés pendant la saison du VRS. Les enfants âgés de moins d'un an représentaient 69 % des hospitalisations liées au VRS et environ 95 % des séjours en USIP. Parmi les nourrissons de moins de 3 mois qui ont été hospitalisés en raison du VRS, 7 % ont été admis dans une USIP, versus 4 % pour l'ensemble des enfants de moins d'un an et 0,5 % des enfants d'un an ou plus. Le nombre total d'hospitalisations associées au VRS sur la période de 8 ans était similaire entre les enfants nés en dehors des saisons de VRS (avril à septembre) et ceux nés pendant les saisons de VRS. Un total de 87 % des enfants hospitalisés pour le VRS étaient en bonne santé apparente, et parmi les enfants dont l'âge gestationnel était connu (N = 270 048), 89 % étaient nés à terme, tout comme plus de la moitié de ceux admis en USIP [13].

Après l'introduction de mesures gouvernementales française générales non pharmaceutiques strictes lors de la première vague de la pandémie de COVID-19 en février-mars 2020 en France, la circulation diffuse du VRS a cessé et les admissions en USIP pour bronchiolite ont diminué de manière significative [26-32].

**Tableau 1** : Nombre de séjours hospitaliers liés au VRS et coût total des hospitalisations par groupe d'âge au cours des saisons de VRS de 2010 à 2018 chez les enfants âgés de moins de 5 ans en France.

| Saison de VRS | Groupe d'âges (mois) |                  |        |                  |       |                  |       |                  |       |                  |       |                  |        |                  |
|---------------|----------------------|------------------|--------|------------------|-------|------------------|-------|------------------|-------|------------------|-------|------------------|--------|------------------|
|               | < 3                  |                  | 3-5    |                  | 6-11  |                  | 12-23 |                  | 24-35 |                  | 36-59 |                  | All    |                  |
|               | SH, N                | Coût, Millions € | SH, N  | Coût, Millions € | SH, N | Coût, Millions € | SH, N | Coût, Millions € | SH, N | Coût, Millions € | SH, N | Coût, Millions € | SH, N  | Coût, Millions € |
| 2010/2011     | 13,691               | 37.0             | 8146   | 18.4             | 8098  | 16.3             | 7026  | 12.1             | 3105  | 4.6              | 3649  | 4.8              | 43,715 | 93.2             |
| 2011/2012     | 15,351               | 41.2             | 8665   | 20.1             | 8888  | 18.3             | 7730  | 13.4             | 3482  | 5.0              | 3857  | 5.0              | 47,973 | 103.0            |
| 2012/2013     | 17,515               | 49.9             | 9191   | 21.4             | 8562  | 17.3             | 7576  | 13.2             | 3658  | 5.4              | 4447  | 5.8              | 50,949 | 113.0            |
| 2013/2014     | 17,280               | 47.8             | 9476   | 22.2             | 8551  | 17.4             | 7418  | 12.6             | 3471  | 5.2              | 4177  | 5.6              | 50,373 | 111.0            |
| 2014/2015     | 16,572               | 44.4             | 8735   | 19.4             | 8604  | 16.8             | 7472  | 12.5             | 4071  | 5.9              | 5274  | 7.0              | 50,728 | 106.0            |
| 2015/2016     | 18,873               | 62.9             | 10,071 | 27.3             | 9236  | 20.8             | 7918  | 14.5             | 3837  | 5.8              | 4650  | 6.1              | 54,585 | 137.4            |
| 2016/2017     | 18,102               | 64.3             | 10,127 | 29.3             | 9397  | 22.8             | 8109  | 15.6             | 3877  | 6.1              | 4474  | 6.0              | 54,086 | 144.2            |
| 2017/2018     | 18,734               | 54.6             | 10,458 | 29.9             | 9492  | 19.9             | 7752  | 13.2             | 3703  | 5.5              | 4477  | 6.0              | 54,616 | 124.1            |
| Mean          | 17,015               | 50.2             | 9359   | 22.9             | 8854  | 18.7             | 7625  | 13.4             | 3651  | 5.4              | 4376  | 5.8              | 50,878 | 116.4            |

Tableau tiré de Demont et al. 2021 [13], sous licence Creative Commons Attribution 4.0 International License.  
SH, séjours hospitaliers ; VRS, virus respiratoire syncytial.

Une étude a montré une réduction de 85,3 % des admissions en USIP pour bronchiolite entre septembre et décembre 2020 par rapport aux admissions prévues [32]. Une autre étude a constaté une diminution de 36 % des admissions pour des infections virales respiratoires entre mars et mai 2020 par rapport aux admissions de mars à mai 2019 [31]. Cependant, au début de 2021, une épidémie tardive de VRS, relativement limitée et courte, est survenue en France après l'assouplissement des mesures barrières (Fig. 1) [28, 29]. Cette saison de VRS 2020/21, différée, présentait certaines caractéristiques atypiques, dont une proportion accrue d'hospitalisations pour des nourrissons de plus de 3 mois [24, 26-29, 35]. Rien ne permet d'affirmer avec certitude que contracter une première infection par le VRS à un âge plus avancé diminue le risque de forme grave [29]. Cependant, cet âge médian plus élevé des enfants atteints d'IVRI associée au VRS observé en 2020/21 pourrait être responsable de la durée médiane plus courte du séjour à l'hôpital et d'un taux d'admission moins élevé en USIP au cours de cette saison [26].

En raison de l'absence du VRS dans l'environnement en 2020/2021, les cohortes de jeunes nourrissons sont immunologiquement naïves vis à vis du VRS.

L'observation de très graves IVRI associées au VRS (infection par le VRS avec hospitalisation, une  $SpO_2 < 90\%$  et difficultés alimentaires) chez ces enfants plus âgés lorsque le VRS est réapparu semble corroborer cette hypothèse [27]. Par la suite la saison 2021/2022 de VRS a commencé plus tôt que d'habitude, d'importance similaire aux saisons pré-COVID, malgré le maintien de certaines mesures barrières encore en place (notamment le port du masque dans les transports en commun et lors des réunions en espace clos) [27, 28]. En revanche, la saison 2022/2023 a été caractérisée par un début plus précoce et un nombre élevé de visites aux urgences et d'hospitalisations pour bronchiolite chez les enfants de moins de 2 ans [22, 23].

Il convient de noter que même des interventions non pharmaceutiques (INP) rigoureuses n'empêchent pas complètement la circulation du VRS, en particulier dans les maisonnées et les communautés semi-fermées comme les crèches. Les INP ne peuvent raisonnablement pas être

appliquées tout au long de l'enfance et pendant toute la période de circulation intense du VRS ; cependant, des changements de comportement parmi les contacts familiaux des nouveau-nés et des jeunes nourrissons (c'est-à-dire se laver davantage les mains, se couvrir la bouche en cas de toux et éviter les grands rassemblements et les contacts étroits avec des personnes malades) sont susceptibles de contribuer à réduire l'incidence de l'infection chez les nourrissons âgés de 3 mois ou moins [25, 27]. Il est donc recommandé de promouvoir la généralisation de ces mesures barrières de manière continue pendant l'épidémie [25, 36].

## UTILISATION ET RÉPARTITION DES RESSOURCES DE SANTÉ

La morbidité associée à l'infection quasi-universelle des jeunes enfants par le VRS est à l'origine d'un fardeau sanitaire et économique considérable, incluant les visites ambulatoires chez les médecins généralistes et les pédiatres, les passages dans les services d'urgence, mais aussi hospitalisations avec ou non transferts en USIP et les coûts liés aux traitements prescrits [12, 33, 37-39]. Les coûts non médicaux directs (c.-à-d. le transport et la nourriture) et indirects (c.-à-d. la perte de productivité) encourus par les soignants et les familles des enfants atteints d'une infection par le VRS ajoutent encore au fardeau financier et sociétal de la maladie [33]. Des études menées dans des pays à revenus élevé et faible ont démontré l'impact sur les familles de l'hospitalisation d'un enfant due au VRS, en termes de temps consacré aux visites à l'hôpital et de dépenses personnelles (telles que les déplacements, le stationnement, les repas à l'hôpital et les coûts supplémentaires pour la garde des frères et sœurs) qui peuvent conduire à des difficultés financières [40, 41]. De plus, compte tenu de la morbidité prolongée associée aux séquelles des IVRI dues au VRS, les coûts à long terme sont susceptibles d'être conséquents quand le suivi est poursuivi au-delà de la période aiguë [33].

De 2010 à 2018 en France, les enfants nés à terme ont généré 66 % du coût total des hospitalisations associées au VRS (89 % en considérant les enfants nés à terme et d'âge gestation-

nel inconnu). Indépendamment de la saison, de facteurs de risque et de l'âge gestationnel, les enfants de moins d'un an représentaient près de 80 % des coûts d'hospitalisation, dont la moitié était générée par les nourrissons de moins de 3 mois, ce qui est probablement dû au taux plus élevé d'admission en USIP dans ce groupe d'âge le plus jeune. La durée médiane d'hospitalisation était de trois nuits pour les enfants de moins d'un an et de deux nuits pour les enfants âgés d'un an ou plus [13]. Les coûts d'hospitalisation liés au VRS chez tous les enfants de moins de 5 ans ont été compris entre 93,2 millions d'euros et 144,2 millions d'euros par saison (Tableau 1) [13]. Au cours de cette période, le coût total moyen des hospitalisations liées au VRS s'est élevé à 116,4 millions d'euros, avec un coût moyen par séjour de 2289 €. Le coût moyen estimé d'hospitalisation liée au VRS d'un enfant présentant au moins un facteur de risque (malformation cardiaque congénitale ou dysplasie broncho-pulmonaire, trisomie 21 ou mucoviscidose avec manifestations pulmonaires) était plus élevé que celui d'un enfant sans facteur de risque (2947 € contre 2208 €, respectivement) [13]. Le coût moyen estimé par hospitalisation chez les enfants de moins de 1 an était de 2607 €. Comme cela a été observé dans d'autres pays, l'utilisation et le coût des soins intensifs ont augmenté de façon notable ces dernières années en France [42]. Les données du CHU de Lyon montrent que le coût d'hospitalisation par enfant au cours de quatre saisons successives de VRS (2014-2016) était plus élevé chez les enfants de moins de 1 mois (4892 € pour un séjour médian de 5,0 jours) que chez ceux âgés de 1 à 3 mois (3958 € pour un séjour médian de 4,0 jours) et chez ceux âgés de 3 mois à 1 an (3234 € pour un séjour médian de 4,0 jours) [43]. Lorsque l'on examine l'estimation des coûts et de l'impact des hospitalisations liées au VRS, il convient de noter qu'elle risque d'être sous-estimée, car le virus impliqué dans les hospitalisations n'est pas toujours déterminé ou correctement enregistré [13]. De plus, l'impact économique et humain, immédiat et à plus long terme (après la sortie de l'hôpital), des hospitalisations associées au VRS n'a pas été déterminé dans ces études [13, 43]. Cet impact peut être particulièrement important pour les familles

considérées comme précaires (score multifactoriel qui décrit un ensemble de circonstances indésirables liées à l'emploi [y compris les bas salaires], à l'insécurité économique, à un logement inadéquat, à des problèmes de santé et à un manque de liens sociaux) [44].

Le coût annuel élevé des hospitalisations liées au VRS chez les jeunes enfants en France avant la pandémie de COVID-19 reflétait la pression considérable exercée chaque hiver sur le système hospitalier et les ressources sanitaires françaises par l'infection due au VRS chez les nourrissons nés pendant ou en dehors de leur première saison de VRS, ainsi que l'impact sur les ressources hospitalières et le personnel de santé, y compris la saturation potentielle des USIP, en particulier au pic de la saison épidémique. Les sévères perturbations associées au flux de patients et l'impact sur l'adaptation des capacités des lits d'hospitalisation ont entraîné des retards dans le traitement des maladies non liées au VRS (par exemple, les chirurgies non urgentes ou d'autres hospitalisations programmées demandées par des spécialistes) et la redéfinition fréquente des priorités/réallocation des ressources a été nécessaire [13]. Maintenant que la plupart des mesures gouvernementales de santé publique liées à la pandémie de COVID-19 ont été assouplies en France, d'importantes ressources hospitalières pédiatriques pourraient être libérées et allouées ailleurs si un programme efficace de prévention primaire du VRS pouvait être mis en œuvre chez tous les jeunes enfants [13, 33].

Outre les hospitalisations pour une infection aiguë à VRS, les conséquences à long terme de l'IVRI par le VRS (sifflement ou *wheezing* récurrent, altération de la fonction respiratoire et asthme), les consultations régulières chez le médecin généraliste et le spécialiste, et les hospitalisations qui en résultent, doivent également être prises en compte lors de l'évaluation du fardeau sociétal et financier des infections dues au VRS, et du rapport coût-efficacité des programmes de prévention primaire [2, 14, 15]. Une proportion considérable d'enfants sont réhospitalisés après une première hospitalisation pour le VRS. En France, de 2010 à 2018, 21 % des enfants ont été hospitalisés toutes causes confondues dans les 3 mois qui ont suivi une première hospitalisation associée au VRS, dont



près des deux tiers (64 %) qui avaient moins de 1 an [13]. Cependant, les taux de ré-hospitalisations pour d'autres maladies après l'admission initiale n'étaient pas connus. Une autre hospitalisation due au VRS a eu lieu pendant cette période chez 12 % des enfants, avec une incidence plus élevée chez les enfants prématurés (21,6 %) que chez les enfants nés à terme (11,2 %) [13]. Bien que l'on ne sache pas s'il y a un lien de causalité entre infection à VRS et les sifflements/asthmes récurrents, le fait de prévenir la morbidité respiratoire chronique et l'utilisation des ressources associées est un avantage secondaire potentiel des stratégies réussies de prévention de l'infection par le VRS chez tous les jeunes enfants [2, 14, 15, 45, 46]. En outre, la prévention de la morbidité respiratoire chronique limite l'impact négatif sur la qualité de vie de l'enfant (par exemple, désorganisation intra-familiale, stress traumatique, impact sur les activités quotidiennes et charge émotionnelle pour l'enfant, les parents et les frères et sœurs).

## OPTIONS DE GESTION POUR LA PRÉVENTION : UNE PERSPECTIVE DE SANTÉ PUBLIQUE

Au cours des deux premières années de la pandémie de COVID-19, les bénéfices des mesures gouvernementales généralisées non pharmaceutiques sur l'infection par le VRS chez les nourrissons ont été évidents, mais observés de façon temporaire, puisque les bénéfices ont cessé une fois les restrictions levées [25]. Il s'agit maintenant de prévenir l'apparition d'une certaine lassitude liée aux restrictions dues à la pandémie et d'encourager les personnes à maintenir certaines de ces mesures d'hygiène non pharmaceutiques sur le long terme. En particulier, l'utilisation appropriée des masques, la distanciation physique, le fait d'éviter des contacts étroits avec des personnes malades, le fait de se couvrir la bouche lorsque l'on tousse et les mesures d'hygiène des mains et des surfaces devraient rester une priorité majeure de santé publique pour prévenir l'infection et la maladie liée au VRS. Ces mesures devraient être activement promues dans les familles de tous les enfants jusqu'à l'âge de 1 an (mais particulièrement dans celles qui ont des

enfants de moins de 3 mois) en France et dans d'autres pays, dans un avenir proche, au moins pendant la période classique des épidémies saisonnières de VRS [25, 27, 47]. Les systèmes de santé doivent être préparés aux futures épidémies annuelles d'infections par le VRS, étant donné que les interventions de santé publique et les restrictions aux voyages internationaux sont inévitablement assouplies [29, 48–50].

Le développement de systèmes de surveillance efficaces qui recueillent des informations sur les épidémies de VRS, notamment la saisonnalité, les caractéristiques des souches, l'impact/gravité de la maladie et les groupes à risque, est essentiel pour éclairer la prise de décision concernant les stratégies de traitement et de prévention du VRS. Ces systèmes pourraient être aussi utilisés pour évaluer l'efficacité et l'impact de diverses stratégies d'immunisation. Les systèmes de surveillance sentinelle sont ceux qui ont été créés avec, comme objectif principal, la surveillance et consistent en des réseaux de haute qualité qui prélèvent systématiquement des échantillons chez les patients ; la France dispose de deux systèmes de ce type dédiés à la surveillance du VRS, qui sont respectivement basés chez les médecins généralistes et dans les hôpitaux [51]. La France possède aussi un système non sentinelle, qui est passif et qui recueille les notifications de cas ou de résultats de laboratoire [51]. Bien que les systèmes de surveillance sentinelle puissent être considérés comme l'option préférée, ils ont l'inconvénient de ne couvrir qu'une petite partie de la population et, par conséquent, il se peut qu'ils ne saisissent pas les informations sur les populations pédiatriques, à moins qu'ils ne soient spécifiquement axés sur les nourrissons [51]. La surveillance génomique devrait être utilisée pour déterminer quelles souches de VRS circulent, la gravité de la maladie causée par chaque souche et toute évolution génétique du virus. Cela fournira des informations importantes sur l'impact de l'immunisation sur la maladie causée par les différents sous-types de virus et, inversement, sur l'impact des changements viraux sur l'efficacité des vaccins/antiviraux et la détection des antigènes. Pour chaque échantillon positif au VRS reçu dans les principaux laboratoires de France, le type de virus est déterminé [51]. Il a été suggéré de mettre en place une surveillance

cohérente du VRS à dans l'ensemble de l'union européenne (UE), dans laquelle les systèmes nationaux se conforment à des recommandations spécifiques [52]. L'objectif est d'assurer entre les États membres une homogénéité du recueil des données, ce qui permettra l'harmonisation des données et leur comparaison au niveau européen [52].

À ce jour, le seul agent pharmaceutique disponible pour prévenir les infections graves par le VRS chez les enfants est l'anticorps monoclonal spécifique du VRS, le palivizumab, [20, 53-55]. Par rapport au placebo ou à l'absence d'intervention, le palivizumab a permis de réduire les hospitalisations dues au VRS chez les nourrissons à haut risque dans le cadre d'essais randomisés. L'analyse de cinq essais a révélé un rapport de risque (RR) de 0,44 (intervalle de confiance à 95 % [IC] de 0,30-0,64) pour ces hospitalisations après deux ans de suivi, bien que l'impact sur la mortalité soit faible ou nul (RR de 0,69, IC à 95 % de 0,42-1,15) [56, 57]. Cependant, le palivizumab n'a pas été étudié chez des enfants en bonne santé et il pourrait être rentable uniquement pour certains sous-groupes d'enfants à haut risque [53]. L'immunisation passive par le palivizumab n'est donc remboursée par le système de sécurité sociale français que pour les sous-groupes de nourrissons à haut risque suivants, tels que définis par les directives de la Commission de la transparence française : enfants nés prématurés à un terme inférieur ou égal à 32 semaines d'aménorrhée avec antécédent de dysplasie bronchopulmonaire attesté par un besoin en O<sub>2</sub> à 28 jours et (1) un âge inférieur à 6 mois au moment de l'apparition de l'épidémie de VRS ou (2) un âge inférieur à 24 mois au moment de l'apparition de l'épidémie de VRS et une dysplasie broncho-pulmonaire modérée ou sévère ayant nécessité un traitement dans les 6 mois précédents ; et (3) un âge inférieur à 24 mois au moment de l'apparition de l'épidémie de VRS et une cardiopathie congénitale hémodynamiquement significative [53, 58].

Par ailleurs, les nourrissons nés à terme et en bonne santé représentent jusqu'à 90 % des hospitalisations liées au VRS en France [13]. Par conséquent, à moins que le palivizumab ne soit utilisé hors indications et non conformément aux recommandations de la Commission de la

transparence, seule une petite proportion à très haut risque de la population infantile française pourrait bénéficier d'une immunoprophylaxie contre le VRS [53, 58, 59]. Dans une étude, l'utilisation hors indication du palivizumab a été observée dans des proportions relativement élevées de la population globale des nourrissons (à terme + prématurés) (40 % des nourrissons âgés de moins de 6 mois et 59 % des nourrissons âgés de moins de 24 mois) [58]. Toutefois, l'utilisation généralisée du palivizumab est limitée par son coût élevé, sa demi-vie courte (nécessitant jusqu'à cinq injections intramusculaires mensuelles pendant la saison du VRS [20, 60]) et le manque d'observance des patients (ce qui entraîne souvent une prophylaxie incomplète) [53]. Il y a un besoin évident d'une alternative coût/efficace au palivizumab, et qui soit à longue durée d'action, pour protéger tous les nourrissons, indépendamment de l'âge gestationnel ou de comorbidités, et ce, tout au long de leur première saison de VRS [20, 21, 61].

Les futures approches potentielles, universelles, pour la prévention du VRS combinent différentes stratégies d'immunisation passive et active et comprennent (1) la vaccination maternelle pendant la grossesse, (2) la vaccination des nourrissons et (3) l'administration d'anticorps monoclonaux à longue durée d'action aux nourrissons à la naissance ou peu après, suivie éventuellement d'une protection pendant leur deuxième saison de VRS par une vaccination (Fig. 2) [62].

La vaccination maternelle entraînerait l'immunisation passive des nourrissons avant l'accouchement par transfert d'anticorps protecteurs. En raison de la disparition progressive des anticorps ainsi acquis au fil du temps, la protection conférée par la vaccination maternelle serait vraisemblablement de 2 à 4 mois, de sorte qu'il s'agirait d'une option valable uniquement pour les enfants dont la naissance devrait avoir lieu pendant ou juste avant la saison du VRS pour combler en partie la fenêtre de vulnérabilité entre la naissance et la vaccination active des nourrissons [14, 62, 63]. Si, par exemple, la vaccination des mères contre le VRS conférait aux nourrissons une protection de 4 mois, alors seuls les enfants nés en France entre septembre et février seraient protégés pendant le pic de leur

### COHORTE DE NOURRISSONS DANS LEUR PREMIÈRE ANNÉE

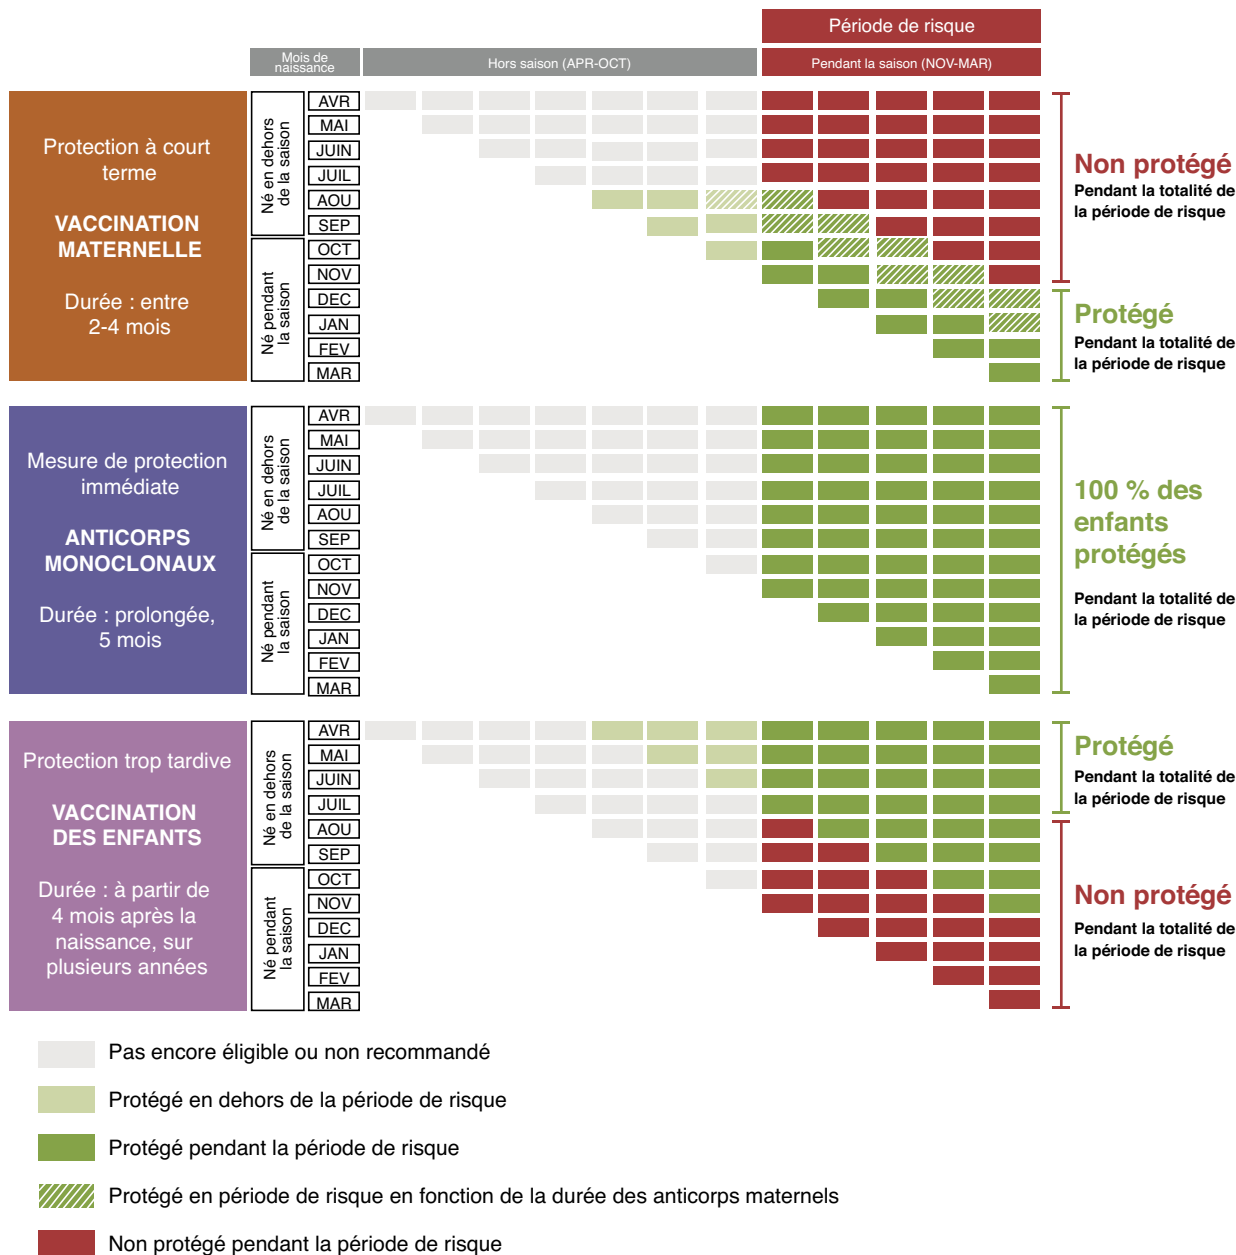

**Fig. 2** Futures options potentielles pour la prévention du virus respiratoire syncytial au cours de la première année de vie. Figure tirée d’Azzari *et al.* 2021 [14], sous licence Creative Commons Attribution 4.0 International License et Janet *et al.* [62] : Respiratory syncytial virus seasonality

and its implications on prevention strategies. *Human Vaccines and Immunotherapeutics* 2018, 14(1):234–44, reproduit avec l’autorisation de Taylor & Francis Ltd. <http://www.tandfonline.com>

première saison de VRS, avec réduction la plus importante de la maladie chez les enfants nés en octobre ou novembre . Bien qu’il ait été démontré que le transfert efficace des anticorps mater-

nels contre le VRS aux nourrissons a bien lieu après la vaccination maternelle contre le VRS [64], cette approche n’a pas permis de conférer une protection contre les IVRI associées au VRS

médicalement significatives chez les nourrissons pendant une période allant jusqu'à 90 jours de vie (critère d'évaluation principal) dans le seul essai clinique de phase 3 terminé à ce jour sur la vaccination maternelle contre le VRS [63]. Cependant, l'efficacité du vaccin a été démontrée sur les critères d'évaluation secondaires de l'IVRI associée au VRS dont l'hypoxémie sévère et l'hospitalisation pour IVRI par le VRS, ce qui suggère les potentiels avantages d'une stratégie de vaccination maternelle contre le VRS [63, 65, 66]. Néanmoins, il convient de noter que l'efficacité de la vaccination pendant la grossesse repose sur le transport des anticorps à travers le placenta. Il s'agit d'un processus actif, saturable et compétitif, qui peut donc être négativement affecté par divers facteurs maternels, dont les immunoglobulines [67] (comme cela a été démontré pour le transfert d'anticorps spécifiques contre la rougeole et le tétanos de la mère au nouveau-né [67, 68]) et les anticorps induits par d'autres vaccins administrés pendant la grossesse, tels que ceux contre la grippe et la coqueluche. En outre, la meilleure période de vaccination pour induire le plus grand transfert d'anticorps reste à définir.

Un certain nombre de vaccins contre le VRS destinés à être administrés aux nourrissons en sont aux derniers stades du développement clinique, mais il faudra attendre probablement quelques années avant qu'un vaccin soit approuvé pour une utilisation clinique de routine [20, 69, 70]. De plus, ces vaccins ne seront pas administrés à la naissance, de sorte que tous les enfants ne seraient pas protégés pendant toute la durée de leur première saison de VRS si la prévention reposait uniquement sur la vaccination [14, 62]. Par exemple, un enfant né en France en octobre et vacciné selon un calendrier infantile de 2, 3 et 4 mois (c'est-à-dire en décembre, janvier et février) resterait exposé pendant une grande partie de sa première saison de VRS.

Le nirsévimab, qui agit comme une immunisation passive, est un anticorps monoclonal unique à longue durée d'action qui peut conduire à une protection presque immédiate des nourrissons pendant toute une saison épidémique de VRS après une seule injection intramusculaire. Il a donné des résultats prometteurs lors d'essais cliniques chez des nourrissons en bonne santé nés à terme et prématurés [20, 21, 63, 71–73].

Des simulations ont montré qu'un anticorps monoclonal à demi-vie significativement prolongée, tel que le nirsévimab, pourrait présenter des avantages considérables pour la santé publique, en réduisant d'au moins 50 % l'impact des IVRI liées au VRS entre l'âge de 6 à 12 mois [74, 75], avec un nombre annuel de nourrissons traités pour prévenir les infections à VRS comparable à celui des autres vaccinations de l'enfant [76]. En pratique, l'administration aux jeunes nourrissons pourrait avoir lieu avant la sortie de la maternité, ou au cours de la première visite de suivi pédiatrique après la sortie de la maternité, pour tous les nouveau-nés (visite post-natale systématique effectuée au cours de la 2e semaine suivant la naissance, entre les 6e et 10e jours ; des visites de suivi supplémentaires pourraient être proposées entre les 11e et 28e jours de vie en fonction de l'évaluation initiale), ou au cours de l'une des visites médicales régulières recommandées et remboursées proches du début de la saison du VRS, pour un rapport coût/efficacité favorable [77]. L'une ou l'autre de ces possibilités pourrait être suivie d'une vaccination ultérieure du nourrisson afin d'obtenir une protection plus durable et éventuellement limiter la circulation du VRS [14, 62].

Le choix de la période d'administration du nirsévimab pourrait également être basé sur le mois de naissance du nourrisson par rapport à la saison du VRS, c'est-à-dire qu'un enfant né entre mars et mai pourrait recevoir l'anticorps monoclonal avant le début de la saison épidémique, alors qu'un enfant né entre octobre et février pourrait le recevoir à la naissance. Il faut garder à l'esprit que cette dernière stratégie peut nécessiter une détermination précise de la saison du VRS et une planification fondée sur des preuves pour être efficace [61, 78], alors qu'une stratégie d'administration post-natale en routine en maternité serait relativement facile à comprendre et à respecter pour les médecins et les parents.

Les professionnels de santé et les organisations médicales devront donc travailler en étroite collaboration avec les autorités de santé publique afin de garantir la mise en place de stratégies appropriées et faciles à mettre en œuvre pour permettre l'utilisation systématique d'innovations technologiques, telles que les anticorps mono-

clonaux à longue durée d'action, dans le but de prévenir l'infection grave liée au VRS chez tous les nourrissons [78].

## CONCLUSIONS

Les données nationales sur les hospitalisations et les coûts liés aux épidémies de VRS soulignent l'importance que ces dernières ont sur les capacités des hôpitaux pédiatriques, ainsi que le besoin urgent de mesures efficaces pour prévenir les maladies dues au VRS en France. Les données épidémiologiques sur le VRS en France sont conformes aux données internationales, avec l'impact le plus important chez les enfants de moins de 1 an nés à terme. La surveillance nationale continue du VRS (et son intégration éventuelle dans un système couvrant l'ensemble de l'Europe), qui permet de recueillir des données sur la saisonnalité, les caractéristiques des souches, l'incidence en communauté, la gravité de la maladie (y compris les taux d'hospitalisation associés) et l'apparition de sifflements ou *wheezing* récurrents et d'asthme après une infection par le VRS, est importante pour conduire les politiques de prévention et pour surveiller leur succès en termes de réduction de l'impact du VRS.

La réduction du fardeau des IVRI associées au VRS reposera sur l'éducation des parents aux mesures de prévention à l'exposition au VRS et à sa transmission. Dans le cadre de cette approche éducative, les pratiques préventives non pharmaceutiques, telles que le lavage régulier des mains et la distanciation sociale/le fait d'éviter les contacts étroits avec des personnes malades, devraient être fortement encouragées auprès des nouveaux parents afin de réduire l'impact du VRS chez les nourrissons naïfs de VRS. Le palivizumab devrait également continuer à être utilisé pour réduire l'impact de la morbidité liée au VRS chez les nourrissons à très haut risque d'hospitalisation. Une meilleure utilisation des ressources et une diminution des coûts pourraient être réalisées et/ou affectées à d'autres besoins de santé grâce à un programme de prévention efficace et universel de l'infection à VRS englobant tous les nourrissons lorsque les programmes d'immunisation active et passive seront disponibles. Les

données sur les vaccins contre le VRS et les anticorps monoclonaux contre le VRS, coût/efficaces, à longue durée d'action pourraient servir de base aux futures décisions de santé publique.

En étroite collaboration avec les parties prenantes chargées de prescrire et d'administrer les nouveaux traitements (c'est-à-dire les obstétriciens, les pédiatres, les médecins généralistes, les infirmiers, les pharmaciens et les sage-femmes), les autorités de santé publique devraient concevoir des stratégies de prévention et établir des parcours de soins dédiés afin d'offrir la protection à tous les enfants au cours de leur première saison de VRS, indépendamment de l'âge gestationnel ou de comorbidités associées. Le renforcement d'un partenariat et d'une collaboration entre les parents de nouveau-nés, les professionnels des soins de santé primaires de première ligne et les autorités de santé publique sera nécessaire pour le déploiement coordonné de nouvelles stratégies pharmaceutiques de prévention du VRS afin de réduire la pression que le VRS exerce chaque année sur les systèmes de santé.

## REMERCIEMENTS

**Financement.** Ce travail a été sponsorisé par Sanofi, qui a participé à la rédaction du manuscrit et à la décision de le soumettre pour publication. L'aide à la rédaction médicale pour la préparation de cette revue et les frais de service rapide du journal ont été financés par Sanofi.

**Rédaction médicale, édition et autre assistance.** Nous tenons à remercier Jo Dalton, rédactrice médicale indépendante, qui a rédigé l'ébauche et les versions ultérieures de ce manuscrit au nom de Springer Healthcare Communications. Cette aide à la rédaction médicale a été financée par Sanofi.

**Auteurs.** L'auteur correspondant atteste que tous les auteurs nommés répondent aux critères de l'International Committee of Medical Journal Editors (ICMJE) en matière de paternité pour cet article, et qu'aucun autre répondant aux critères n'a été omis. Tous les auteurs ont eu un accès complet aux données, acceptent la responsabilité de l'intégrité du travail dans son ensemble

et ont donné leur accord pour que cette version soit soumise à la publication.

**Contributions des auteurs.** Conception et design de la revue : Didier Pinquier, Pierre Tissières, Jean-Christophe Roze, Catherine Weil-Olivier, Etienne Javouhey, François Dubos ; analyse et interprétation des données : tous les auteurs ; rédaction-révision et édition : tous les auteurs ; approbation de la version finale pour publication : tous les auteurs ; François Dubos, Catherine Weil-Olivier, et Didier Pinquier ont directement accédé aux données sous-jacentes rapportées dans le manuscrit et les ont vérifiées.

**Divulgations.** Didier Pinquier déclare avoir reçu des honoraires de Sanofi-Pasteur pour des conférences sur le VRS, pour la participation à des comités consultatifs sur le VRS menés par Sanofi-Pasteur, et des honoraires d'AstraZeneca, GSK et Merck ; Pascal Crépey déclare avoir reçu des honoraires de consultation de Sanofi, en dehors du travail soumis, et des honoraires pour la participation à des conseils consultatifs sur le VRS menés par Sanofi ; Astrid Vabret a reçu des honoraires pour sa participation à des comités consultatifs sur le VRS organisés par Sanofi ; Jean-Christophe Roze ne signale aucun conflit d'intérêts ; François Dubos déclare avoir reçu des honoraires pour sa participation à des comités consultatifs sur le VRS organisés par Sanofi, et des honoraires pour sa participation à des comités consultatifs sur la dengue organisés par Takeda et sur les vaccins organisés par MSD ; Fabienne Cahn-Sellem déclare avoir reçu des honoraires pour des conférences, un soutien à des réunions et une participation à des comités consultatifs de Sanofi ; Robert Cohen déclare avoir reçu des subventions à l'institution ACTIV, des honoraires personnels et un soutien non financier de GSK, Sanofi, Pfizer et Merck, en dehors des travaux soumis, ainsi que des honoraires pour sa participation à des comités consultatifs sur le VRS menés par Sanofi ; Catherine Weil-Olivier a reçu des honoraires de Sanofi-Pasteur pour des conférences sur le VRS, pour sa participation à des comités consultatifs sur le VRS organisés par Sanofi-Pasteur, et d'autres honoraires de GSK, Janssen, Merck et Pfizer ; Pierre Tissières et Etienne Javouhey ont reçu des honoraires pour

leur participation à des comités consultatifs sur le VRS organisés par Sanofi-Pasteur et Sanofi, respectivement.

**Respect des directives en matière d'éthique.** Cet article est basé sur des études menées précédemment et ne contient aucune nouvelle étude réalisée par l'un des auteurs, avec des participants humains ou des animaux.

**Accès libre.** Cet article est soumis à une licence Creative Commons Attribution-Non-Commercial 4.0 International License, qui autorise toute utilisation, tout partage, toute adaptation, toute distribution et toute reproduction à des fins non commerciales, quel que soit le support ou le format, à condition de citer le ou les auteurs originaux et la source, de fournir un lien vers la licence Creative Commons et d'indiquer si des modifications ont été apportées. Les images ou autre matériel de tiers figurant dans cet article sont inclus dans la licence Creative Commons de l'article, sauf indication contraire dans une ligne de crédit au matériel. Si le matériel n'est pas inclus dans la licence Creative Commons de l'article et si l'utilisation que vous souhaitez en faire n'est pas autorisée par la réglementation ou dépasse l'utilisation autorisée, vous devrez obtenir l'autorisation directement auprès du détenteur des droits d'auteur. Pour consulter une copie de cette licence, visitez <http://creativecommons.org/licenses/bync/4.0/>.

## REFERENCES

1. Collins PL, Fearn R, Graham BS. Respiratory syncytial virus: virology, reverse genetics, and pathogenesis of disease. *Curr Top Microbiol Immunol.* 2013;372:3–38. [https://doi.org/10.1007/978-3-642-38919-1\\_1](https://doi.org/10.1007/978-3-642-38919-1_1).
2. Hall CB, Simoes EA, Anderson LJ. Clinical and epidemiologic features of respiratory syncytial virus. *Curr Top Microbiol Immunol.* 2013;372:39–57. [https://doi.org/10.1007/978-3-642-38919-1\\_2](https://doi.org/10.1007/978-3-642-38919-1_2).
3. Li Y, Johnson EK, Shi T, et al. National burden estimates of hospitalisations for acute lower respiratory infections due to respiratory syncytial virus in young children in 2019 among 58 countries: a modelling study. *Lancet Respir Med.* 2021;9(2):175–85. [https://doi.org/10.1016/S2213-2600\(20\)30322-2](https://doi.org/10.1016/S2213-2600(20)30322-2).

4. Shi T, McAllister DA, O'Brien KL, et al. Global, regional, and national disease burden estimates of acute lower respiratory infections due to respiratory syncytial virus in young children in 2015: a systematic review and modelling study. *Lancet*. 2017;390(10098):946–58. [https://doi.org/10.1016/S0140-6736\(17\)30938-8](https://doi.org/10.1016/S0140-6736(17)30938-8).
5. Obando-Pacheco P, Justicia-Grande AJ, Rivero-Calle I, et al. Respiratory syncytial virus seasonality: a global overview. *J Infect Dis*. 2018;217(9):1356–64. <https://doi.org/10.1093/infdis/jiy056>.
6. Broberg EK, Waris M, Johansen K, Snacken R, Penttinen P. Seasonality and geographical spread of respiratory syncytial virus epidemics in 15 European countries, 2010 to 2016. *Euro Surveill*. 2018;23(5):17–00284. <https://doi.org/10.2807/1560-7917.ES.2018.23.5.17-00284>.
7. Lemaitre M, Fouad F, Carrat F, et al. Estimating the burden of influenza-related and associated hospitalizations and deaths in France: an eight-season data study, 2010–2018. *Influenza Other Respir Viruses*. 2022;16(4):717–25. <https://doi.org/10.1111/irv.12962>.
8. Openshaw PJM, Chiu C, Culley FJ, Johansson C. Protective and harmful immunity to RSV infection. *Annu Rev Immunol*. 2017;35:501–32. <https://doi.org/10.1146/annurev-immunol-051116-052206>.
9. Smith DK, Seales S, Budzik C. Respiratory syncytial virus bronchiolitis in children. *Am Fam Physician*. 2017;95(2):94–9.
10. Hall CB, Weinberg GA, Blumkin AK, et al. Respiratory syncytial virus-associated hospitalizations among children less than 24 months of age. *Pediatrics*. 2013;132(2):e341–8. <https://doi.org/10.1542/peds.2013-0303>.
11. Fauroux B, Gouyon JB, Roze JC, et al. Respiratory morbidity of preterm infants of less than 33 weeks gestation without bronchopulmonary dysplasia: a 12-month follow-up of the CASTOR study cohort. *Epidemiol Infect*. 2014;142(7):1362–74. <https://doi.org/10.1017/S0950268813001738>.
12. Bont L, Checchia PA, Fauroux B, et al. Defining the epidemiology and burden of severe respiratory syncytial virus infection among infants and children in western countries. *Infect Dis Ther*. 2016;5(3):271–98. <https://doi.org/10.1007/s40121-016-0123-0>.
13. Demont C, Petrica N, Bardoulat I, et al. Economic and disease burden of RSV-associated hospitalizations in young children in France, from 2010 through 2018. *BMC Infect Dis*. 2021;21(1):730. <https://doi.org/10.1186/s12879-021-06399-8>.
14. Azzari C, Baraldi E, Bonanni P, et al. Epidemiology and prevention of respiratory syncytial virus infections in children in Italy. *Ital J Pediatr*. 2021;47(1):198. <https://doi.org/10.1186/s13052-021-01148-8>.
15. Barr R, Green CA, Sande CJ, Drysdale SB. Respiratory syncytial virus: diagnosis, prevention and management. *Ther Adv Infect Dis*. 2019;6:2049936119865798. <https://doi.org/10.1177/2049936119865798>.
16. Meissner HC. Viral bronchiolitis in children. *N Engl J Med*. 2016;374(1):62–72. <https://doi.org/10.1056/NEJMra1413456>.
17. Essouri S, Laurent M, Chevret L, et al. Improved clinical and economic outcomes in severe bronchiolitis with pre-emptive nCPAP ventilatory strategy. *Intensive Care Med*. 2014;40(1):84–91. <https://doi.org/10.1007/s00134-013-3129-z>.
18. Simoes EAF, Bont L, Manzoni P, et al. Past, present and future approaches to the prevention and treatment of respiratory syncytial virus infection in children. *Infect Dis Ther*. 2018;7(1):87–120. <https://doi.org/10.1007/s40121-018-0188-z>.
19. Coon ER, Stoddard G, Brady PW. Intensive care unit utilization after adoption of a ward-based high-flow nasal cannula protocol. *J Hosp Med*. 2020;15(6):325–30. <https://doi.org/10.12788/jhm.3417>.
20. Domachowske JB, Anderson EJ, Goldstein M. The future of respiratory syncytial virus disease prevention and treatment. *Infect Dis Ther*. 2021;10(Suppl 1):47–60. <https://doi.org/10.1007/s40121-020-00383-6>.
21. Rocca A, Biagi C, Scarpini S, et al. Passive immunoprophylaxis against respiratory syncytial virus in children: where are we now? *Int J Mol Sci*. 2021;22(7):3703. <https://doi.org/10.3390/ijms22073703>.
22. Sante Publique France. Bronchiolitis-weekly newsletter. Week 44; 9 November 2022. <https://www.santepubliquefrance.fr/maladies-et-traumatismes/maladies-et-infections-respiratoires/bronchiolite/documents/bulletin-national/bulletin-epidemiologique-bronchiolite-semaine-44-saison-2022-2023>. Accessed 15 Nov 2022.
23. European Centre for Disease Prevention and Control. Communicable Disease Threats Report-Weekly Bulletin. Week 43, 23–29 October 2022. <https://www.ecdc.europa.eu/sites/default/files/documents/Communicable-disease-threats-report-29-oct-2022.pdf>. Accessed 15 Nov 2022.

24. Delestrain C, Danis K, Hau I, et al. Impact of COVID-19 social distancing on viral infection in France: a delayed outbreak of RSV. *Pediatr Pulmonol.* 2021;56(12):3669–73. <https://doi.org/10.1002/ppul.25644>.
25. Gastaldi A, Donà D, Barbieri E, Giaquinto C, Bont LJ, Baraldi E. COVID-19 lesson for respiratory syncytial virus (RSV): hygiene works. *Children (Basel).* 2021;8(12):1144. <https://doi.org/10.3390/children8121144>.
26. Fourgeaud J, Toubiana J, Chappuy H, et al. Impact of public health measures on the post-COVID-19 respiratory syncytial virus epidemics in France. *Eur J Clin Microbiol Infect Dis.* 2021;40(11):2389–95. <https://doi.org/10.1007/s10096-021-04323-1>.
27. Casalegno JS, Ploin D, Cantais A, et al. Characteristics of the delayed respiratory syncytial virus epidemic, 2020/2021, Rhone Loire, France. *Euro Surveill.* 2021;26(29):2100630. <https://doi.org/10.2807/1560-7917.ES.2021.26.29.2100630>.
28. Santé Publique France. Bulletin épidémiologique bronchiolite, Saison 2020–2021. 2021. <https://www.santepubliquefrance.fr/maladies-et-traumatismes/maladies-et-infections-respiratoires/bronchiolite/donnees/#tabs>. Accessed 14 Nov 2021.
29. van Summeren J, Meijer A, Aspelund G, et al. Low levels of respiratory syncytial virus activity in Europe during the 2020/21 season: what can we expect in the coming summer and autumn/winter? *Euro Surveill.* 2021;26(29):2100639. <https://doi.org/10.2807/1560-7917.ES.2021.26.29.2100639>.
30. Angoulvant F, Ouldali N, Yang DD, et al. Coronavirus disease 2019 pandemic: impact caused by school closure and national lockdown on pediatric visits and admissions for viral and nonviral infections—a time series analysis. *Clin Infect Dis.* 2021;72(2):319–22. <https://doi.org/10.1093/cid/ciaa710>.
31. Breinig S, Mortamet G, Brossier D, et al. Impact of the French national lockdown on admissions to 14 pediatric intensive care units during the 2020 COVID-19 pandemic—a retrospective multicenter study. *Front Pediatr.* 2021;9: 764583. <https://doi.org/10.3389/fped.2021.764583>.
32. Rambaud J, Dauger S, Morin L, et al. Bronchiolitis admissions to intensive care during COVID. *Pediatrics.* 2021;147(4):e2021050103. <https://doi.org/10.1542/peds.2021-050103>.
33. Zhang S, Akmar LZ, Bailey F, et al. Cost of respiratory syncytial virus-associated acute lower respiratory infection management in young children at the regional and global level: a systematic review and meta-analysis. *J Infect Dis.* 2020;222(Suppl 7):S680–7. <https://doi.org/10.1093/infdis/jiz683>.
34. Wildenbeest JG, Billard M-N, Zuurbier RP, et al. The burden of respiratory syncytial virus in healthy term-born infants in Europe: a prospective birth cohort study. *Lancet Respir Med.* 2022. [https://doi.org/10.1016/S2213-2600\(22\)00414-3](https://doi.org/10.1016/S2213-2600(22)00414-3).
35. Rybak A, Levy C, Jung C, et al. Delayed bronchiolitis epidemic in French primary care setting driven by respiratory syncytial virus: preliminary data from the Oursyn study, March 2021. *Pediatr Infect Dis J.* 2021;40(12):e511–4. <https://doi.org/10.1097/INF.00000000000032702021>.
36. Cohen R, Ashman M, Taha MK, et al. Pediatric infectious disease group (GPIP) position paper on the immune debt of the COVID-19 pandemic in childhood, how can we fill the immunity gap? *Infect Dis Now.* 2021;51(5):418–23. <https://doi.org/10.1016/j.idnow.2021.05.004>.
37. Hall CB, Weinberg GA, Iwane MK, et al. The burden of respiratory syncytial virus infection in young children. *N Engl J Med.* 2009;360(6):588–98. <https://doi.org/10.1056/NEJMoa0804877>.
38. Simoes EA. The outpatient burden of respiratory syncytial virus infections in older children. *J Infect Dis.* 2017;215(1):1–3. <https://doi.org/10.1093/infdis/jiw483>.
39. Simoes EAF, Chirikov V, Botteman M, Kwon Y, Kuznik A. Long-term assessment of healthcare utilization 5 years after respiratory syncytial virus infection in US infants. *J Infect Dis.* 2020;221(8):1256–70. <https://doi.org/10.1093/infdis/jiz278>.
40. Leader S, Yang H, DeVincenzo J, Jacobson P, Marcin JP, Murray DL. Time and out-of-pocket costs associated with respiratory syncytial virus hospitalization of infants. *Value Health.* 2003;6(2):100–6. <https://doi.org/10.1046/j.1524-4733.2003.00220.x>.
41. Bhuiyan MU, Luby SP, Alamgir NI, et al. Costs of hospitalization with respiratory syncytial virus illness among children aged <math>\leq 5</math> years and the financial impact on households in Bangladesh, 2010. *J Glob Health.* 2017;7(1): 010412. <https://doi.org/10.7189/jogh.07.010412>.
42. Mahant S, Parkin PC, Thavam T, et al. Rates in bronchiolitis hospitalization, intensive care unit use, mortality, and costs from 2004 to 2018. *JAMA Pediatr.* 2022;176(3):270–9. <https://doi.org/10.1001/jamapediatrics.2021.5177>.
43. Kramer R, Duclos A, Lyon VRS, Lina B, Casalegno JS. Cost and burden of RSV related hospitalisation from 2012 to 2017 in the first year of life in Lyon, France. *Vaccine.* 2018;36(45):6591–3. <https://doi.org/10.1016/j.vaccine.2018.09.029>.



- 
44. McKee M, Reeves A, Clair A, Stuckler D. Living on the edge: precariousness and why it matters for health. *Arch Public Health*. 2017;75:13. <https://doi.org/10.1186/s13690-017-0183-y>.
  45. Abreo A, Wu P, Donovan BM, et al. Infant respiratory syncytial virus bronchiolitis and subsequent risk of pneumonia, otitis media, and antibiotic utilization. *Clin Infect Dis*. 2020;71(1):211–4. <https://doi.org/10.1093/cid/ciz1033>.
  46. Driscoll AJ, Arshad SH, Bont L, et al. Does respiratory syncytial virus lower respiratory illness in early life cause recurrent wheeze of early childhood and asthma? Critical review of the evidence and guidance for future studies from a World Health Organization-sponsored meeting. *Vaccine*. 2020;38(11):2435–48. <https://doi.org/10.1016/j.vaccine.2020.01.020>.
  47. Guedj R, Lorrrot M, Lecarpentier T, Leger P-L, Corvol H, Carbajal R. Infant bronchiolitis dramatically reduced during the second French COVID-19 outbreak. *Acta Paediatr*. 2021;110(4):1297–9. <https://doi.org/10.1111/apa.15780>.
  48. Baker RE, Park SW, Yang W, Vecchi GA, Metcalf CJE, Grenfell BT. The impact of COVID-19 nonpharmaceutical interventions on the future dynamics of endemic infections. *Proc Natl Acad Sci USA*. 2020;117(48):30547–53. <https://doi.org/10.1073/pnas.2013182117>.
  49. Tang JW, Bialasiewicz S, Dwyer DE, et al. Where have all the viruses gone? Disappearance of seasonal respiratory viruses during the COVID-19 pandemic. *J Med Virol*. 2021;93(7):4099–101. <https://doi.org/10.1002/jmv.26964>.
  50. Williams TC, Sinha I, Barr IG, Zambon M. Transmission of paediatric respiratory syncytial virus and influenza in the wake of the COVID-19 pandemic. *Euro Surveill*. 2021;26(29):2100186. <https://doi.org/10.2807/1560-7917.ES.2021.26.29.2100186>.
  51. Mollers M, Barnadas C, Broberg EK, et al. Current practices for respiratory syncytial virus surveillance across the EU/EEA Member States, 2017. *Euro Surveill*. 2019;24(40):1900157. <https://doi.org/10.2807/1560-7917.ES.2019.24.40.1900157>.
  52. Teirlinck AC, Broberg EK, Stuwitz Berg A, et al. Recommendations for respiratory syncytial virus surveillance at the national level. *Eur Respir J*. 2021;58(3):2003766. <https://doi.org/10.1183/13993003.03766-2020>.
  53. Torchin H, Rousseau J, Marchand-Martin L, Truffert P, Jarreau PH, Ancel PY. Palivizumab administration in preterm infants in France: EPIPAGE-2 cohort study. *Arch Pediatr*. 2018;25(2):89–94. <https://doi.org/10.1016/j.arcped.2017.12.009>.
  54. Reeves RM, van Wijhe M, Lehtonen T, et al. A systematic review of European clinical practice guidelines for respiratory syncytial virus prophylaxis. *J Infect Dis*. 2022;226(Suppl 1):S110–6. <https://doi.org/10.1093/infdis/jiac059>.
  55. Haute Autorité de Santé, Commission de la Transparence, Avis. Synagis. 2017. [https://www.has-sante.fr/upload/docs/application/pdf/ct-5014\\_synagis.pdf](https://www.has-sante.fr/upload/docs/application/pdf/ct-5014_synagis.pdf). Accessed 25 May 2022.
  56. Garegnani L, Styrismisdottir L, Roson-Rodriguez P, Escobar-Liquitay CM, Esteban I, Franco JV. Palivizumab for preventing severe respiratory syncytial virus (RSV) infection in children. *Cochrane Database Syst Rev*. 2021;11:CD013757. <https://doi.org/10.1002/14651858.CD013757.pub2>.
  57. Impact-RSV Study Group. Palivizumab, a humanized respiratory syncytial virus monoclonal antibody, reduces hospitalization from respiratory syncytial virus infection in high-risk infants. The Impact-RSV Study Group. *Pediatrics*. 1998;102(3 Pt 1):531–7.
  58. Pinquier D, Gouyon JB, Fauroux B, et al. Palivizumab immunoprophylaxis: use in clinical practice, safety and beneficial effects in France. *Arch Pediatr*. 2009;16(11):1443–52. <https://doi.org/10.1016/j.arcped.2009.08.008>.
  59. Lacaze-Masmonteil T, Truffert P, Pinquier D, et al. Lower respiratory tract illness and RSV prophylaxis in very premature infants. *Arch Dis Child*. 2004;89(6):562. <https://doi.org/10.1136/adc.2003.028282>.
  60. Staebler S, Blake S. Respiratory syncytial virus disease: immunoprophylaxis policy review and public health concerns in preterm and young infants. *Policy Polit Nurs Pract*. 2021;22(1):41–50. <https://doi.org/10.1177/1527154420965543>.
  61. Aranda SS, Polack FP. Prevention of pediatric respiratory syncytial virus lower respiratory tract illness: perspectives for the next decade. *Front Immunol*. 2019;10:1006. <https://doi.org/10.3389/fimmu.2019.01006>.
  62. Janet S, Broad J, Snape MD. Respiratory syncytial virus seasonality and its implications on prevention strategies. *Hum Vaccin Immunother*. 2018;14(1):234–44. <https://doi.org/10.1080/21645515.2017.1403707>.
  63. Madhi SA, Polack FP, Piedra PA, et al. Respiratory syncytial virus vaccination during pregnancy and effects in infants. *N Engl J Med*. 2020;383(5):426–39. <https://doi.org/10.1056/NEJMoa1908380>.
-

64. Munoz FM, Swamy GK, Hickman SP, et al. Safety and immunogenicity of a respiratory syncytial virus fusion (F) protein nanoparticle vaccine in healthy third-trimester pregnant women and their infants. *J Infect Dis.* 2019;220(11):1802–15. <https://doi.org/10.1093/infdis/jiz390>.
65. Meissner HC. Disarming the respiratory syncytial virus. *N Engl J Med.* 2020;383(5):487–8. <https://doi.org/10.1056/NEJMc2021648>.
66. Pollard AJ, Bijker EM. A guide to vaccinology: from basic principles to new developments. *Nat Rev Immunol.* 2021;21(2):83–100. <https://doi.org/10.1038/s41577-020-00479-7>.
67. Gendrel D, Richard-Lenoble D, Massamba MB, et al. Placental transfer of tetanus antibodies and protection of newborn infants. *Arch Fr Pediatr.* 1990;47(10):725–9.
68. Gendrel D, Richard-Lenoble D, Blot P, Fribourg-Blanc A. Transfer of measles immunoglobulins and antibodies from mother to child in Africa and Europe. *Presse Med.* 1988;17(32):1633–6.
69. Billard MN, Bont LJ. Live-attenuated respiratory syncytial virus vaccines: time for the next step. *Am J Respir Crit Care Med.* 2021;203(5):538–9. <https://doi.org/10.1164/rccm.202009-3431ED>.
70. Karron RA, Atwell JE, McFarland EJ, et al. Live-attenuated vaccines prevent respiratory syncytial virus-associated illness in young children. *Am J Respir Crit Care Med.* 2021;203(5):594–603. <https://doi.org/10.1164/rccm.202005-1660OC>.
71. Griffin MP, Yuan Y, Takas T, et al. Single-dose nirsevimab for prevention of RSV in preterm infants. *N Engl J Med.* 2020;383(5):415–25. <https://doi.org/10.1056/NEJMoa1913556>.
72. Domachowske J, Madhi SA, Simões EAF, et al. Safety of nirsevimab for RSV in infants with heart or lung disease or prematurity. *N Engl J Med.* 2022;386(9):892–4. <https://doi.org/10.1056/NEJMc2112186>.
73. Hammitt LL, Dagan R, Yuan Y, et al. Nirsevimab for prevention of RSV in healthy late-preterm and term infants. *N Engl J Med.* 2022;386(9):837–46. <https://doi.org/10.1056/NEJMoa2110275>.
74. Voirin N, Virlogeux V, Demont C, Kieffer A. Potential impact of nirsevimab on RSV transmission and medically attended lower respiratory tract illness caused by RSV: a disease transmission model. *Infect Dis Ther.* 2021;11:277–92. <https://doi.org/10.1007/s40121-021-00566-9>.
75. Rainisch G, Adhikari B, Meltzer MI, Langley G. Estimating the impact of multiple immunization products on medically-attended respiratory syncytial virus (RSV) infections in infants. *Vaccine.* 2020;38(2):251–7. <https://doi.org/10.1016/j.vaccine.2019.10.023>.
76. Finelli L, Choi Y, Goldstein E. Number needed to immunize to prevent RSV with extended half-life monoclonal antibody. *Vaccine.* 2020;38(34):5474–9. <https://doi.org/10.1016/j.vaccine.2020.06.034>.
77. Haute Autorité de Santé. Maternity discharge after childbirth: conditions and organization of the return home of mothers and their newborns. 2014. [https://www.has-sante.fr/jcms/c\\_1290110/fr/sortie-de-maternite-apres-accouchement-conditions-et-organisation-du-retour-a-domicile-des-meres-et-de-leurs-nouveaux-nes](https://www.has-sante.fr/jcms/c_1290110/fr/sortie-de-maternite-apres-accouchement-conditions-et-organisation-du-retour-a-domicile-des-meres-et-de-leurs-nouveaux-nes). Accessed 29 July 2022.
78. Navarro Alonso JA, Bont LJ, Bozzola E, et al. RSV: perspectives to strengthen the need for protection in all infants. *Emerg Themes Epidemiol.* 2021;18(1):15. <https://doi.org/10.1186/s12982-021-00104-5>.

## Note de l'éditeur

Springer Nature reste neutre en ce qui concerne les revendications juridictionnelles dans les cartes publiées et les affiliations institutionnelles.
